# Supplementary material
Source: PubMed Central journal article supplement (PMC9482668)
Supplement: NIHMS1790450-supplement-TS1.pdf [file NIHMS1790450-supplement-TS1.pdf]

## SUPPORTING INFORMATION

**Dense granule biogenesis, secretion and function in *Toxoplasma gondii*** by Michael B. Griffith, Camille S. Pearce, Aoife T. Heaslip

**Table S1.** List of known GRA proteins. \* indicates proteins shown to be cleaved by ASP5. Accession numbers and CRISPR scores were obtained from ToxoDB ([www.ToxoDB.org](http://www.ToxoDB.org)) (Amos et al. 2022).

**Table S1.** List of known GRA proteins. \* indicates proteins shown to be cleaved by ASP5. Accession numbers and CRISPR scores were obtained from ToxoDB ([www.ToxoDB.org](http://www.ToxoDB.org)) (Amos et al. 2022).

| Name                                           | Accession Number | Function                                                                                                                    | Conserved Domains                               | Crispr Score | Reference                                                  |
|------------------------------------------------|------------------|-----------------------------------------------------------------------------------------------------------------------------|-------------------------------------------------|--------------|------------------------------------------------------------|
| Nutrient Acquisition/Associated within the IVN |                  |                                                                                                                             |                                                 |              |                                                            |
| GRA2                                           | TGME49_227620    | Located at the IVN. Needed for IVN formation, suppression of antigen presentation, and uptake of host lipid droplets        | Signal peptide, no transmembrane domain         | 2.47         | (Nolan et al. 2017)                                        |
| GRA6                                           | TgME49_213067    | IVN formation and uptake of host lipid droplets. Located at the IVN and PV.                                                 | transmembrane domain, no signal peptide         | 1.82         | (Ma et al. 2014; Nolan et al. 2017; Rommereim et al. 2019) |
| GRA7                                           | TGME49_203310    | induces the tubulation of artificial liposomes and has been implicated in nutrient acquisition. Located in the PVM and PVMP | transmembrane domain, no signal peptide         | 1.9          | (Coppens et al. 2006; Dunn et al. 2020)                    |
| GRA14                                          | TGGT1_239740     | Uptake of host cytosolic proteins by co-op of ESCRT. Located at the PVM.                                                    | transmembrane domain, no signal peptide         | 2            | (Bai et al. 2018; Rivera-Cuevas et al. 2021)               |
| GRA17                                          | TGME49_222170    | Required for PVM permeability and host nutrient access. Located at the PVM                                                  | no signal peptide or transmembrane domain       | -2.93        | (Gold et al. 2015)                                         |
| GRA23                                          | TGME49_297880    | Required for PVM permeability and host nutrient access. Located at the PVM                                                  | signal peptide and transmembrane domain         | 1.88         | (Gold et al. 2015)                                         |
| GRA64                                          | TGME49_202620    | organizing the recruitment of ESCRT proteins and subsequent intracyclic vesicle formation. Located in the PVM               | signal peptide, transmembrane domains           | 0.94         | (Mayoral unpubl. data)                                     |
| LCAT                                           | TGME49_272420*   | metabolic functions in parasite growth, virulence, and egress of tachyzoites. Located in PVM                                | Alpha-Beta hydrolase fold, no signal peptide or | 0.65         | (Pszenny et al. 2016; Coffey et al. 2018)                  |

|                                        |                |                                                                                                                                               |                                                                                  |       |                                                                              |
|----------------------------------------|----------------|-----------------------------------------------------------------------------------------------------------------------------------------------|----------------------------------------------------------------------------------|-------|------------------------------------------------------------------------------|
|                                        |                |                                                                                                                                               | transmembrane domain                                                             |       |                                                                              |
| NTPaseI                                | TGME49_277240  | Nucleoside-triphosphatase, Possible role in parasite metabolism in the PV lumen, required for parasite proliferation. Found in Type I strains | signal peptide, no transmembrane domain                                          | ND    | (Asai et al. 1995; Krug et al. 2012; Nakaar et al. 1999; Sibley et al. 1994) |
| NTPaseII                               | TGME49_277270  | Nucleoside-triphosphatase , Possible role in parasite metabolism in the PV lumen, required for parasite proliferation                         | signal peptide, no transmembrane domain                                          | ND    | (Asai et al. 1995; Nakaar et al. 1999)                                       |
| PSD1                                   | TGME49_269920  | Decarboxylates phosphatidylserine and needed for membrane biogenesis. Located at the PV                                                       | Phosphatidylserine decarboxylase domain, signal peptide and transmembrane domain | 0.52  | (Gupta et al. 2012)                                                          |
| MYR complex for Effector Translocation |                |                                                                                                                                               |                                                                                  |       |                                                                              |
| MYR1                                   | TGME49_254470* | Translocon complex for export of GRA proteins, located in PVM space                                                                           | transmembrane domain, no signal peptide                                          | 1.04  | (Franco et al. 2016; Marino et al. 2018)                                     |
| MYR2                                   | TGME49_270700  | Translocon complex for export of GRA proteins, located in PVM space                                                                           | transmembrane domain, no signal peptide                                          | 2.39  | (Franco et al. 2016; Marino et al. 2018)                                     |
| MYR3                                   | TGME49_237230  | Translocon complex for export of GRA proteins, located in PVM space                                                                           | No signal peptide, transmembrane domain                                          | 2.83  | (Franco et al. 2016; Marino et al. 2018)                                     |
| MYR4                                   | TGME49_211460* | Translocon complex for export of GRA proteins, located in PVM space                                                                           | No signal peptide, transmembrane domain                                          | 0.25  | (Cygan et al. 2020)                                                          |
| PPMC3                                  | TGME49_270320  | Dephosphorylates secreted effector proteins within the PV                                                                                     | PP2C-class S/T phosphatase domain, no signal peptide, transmembrane domain       | 1.24  | (Mayoral et al. 2020)                                                        |
| GRA44                                  | TGME49_228170* | Putative phosphatase, associates with the translocon complex. Located in the PVM                                                              | acid-phosphatase domain, no signal peptide,                                      | -3.28 | (Panas et al. 2019; Blakely et al. 2020)                                     |

|                                           |                |                                                                                                                                       |                                                                                |      |                                                           |
|-------------------------------------------|----------------|---------------------------------------------------------------------------------------------------------------------------------------|--------------------------------------------------------------------------------|------|-----------------------------------------------------------|
|                                           |                |                                                                                                                                       | transmembrane domain                                                           |      |                                                           |
| Organelle Recruitment                     |                |                                                                                                                                       |                                                                                |      |                                                           |
| MAF1                                      | TGME49_020950* | Mediates Recruitment of Host Mitochondria and Impacts the Host Response at the PVM                                                    | signal peptide, transmembrane domain,                                          | 2.13 | (Pernas et al. 2014)                                      |
| GRA3                                      | TGME49_227280  | interacts with host Golgi and dysregulates anterograde transport from the ER to plasma membrane. Located in the PVM and IVN           | transmembrane domain, no signal peptide                                        | 2.14 | (Craver and Knoll 2007; Deffieu et al. 2019)              |
| Immune Response and Cell cycle regulators |                |                                                                                                                                       |                                                                                |      |                                                           |
| GRA4                                      | TGME49_310780  | elicits both mucosal and systemic immune responses following oral infection of mice with cysts. Maintains the IVN. Located at the IVN | transmembrane domain, no signal peptide                                        | 2.34 | (Labruyere et al. 1999; Nam 2009)                         |
| GRA8                                      | TGME49_254720  | regulates host immune responses by mediating mitochondrial and metabolic changes. Located in the PV.                                  | transmembrane domain, no signal peptide                                        | 1.56 | (Carey et al. 2000; Kim et al. 2018)                      |
| GRA12                                     | TGGT1_275850   | potential immune-related function. Located at the IVN.                                                                                | transmembrane domain, no signal peptide                                        | 1.3  | (Fox et al. 2019; Michelin et al. 2009; Wang et al. 2020) |
| GRA15                                     | TGME49_275470  | activates STING (the interferon stimulator). Located in host cytosol                                                                  | transmembrane domain, no signal peptide                                        | 2.33 | (Rosowski et al. 2011; Wang et al. 2019)                  |
| GRA16                                     | TGME49_208830* | interfering with the cell cycle by regulating p53 to avoid premature immune detection. Located in the host cell nucleus               | Signal peptide, predicted nuclear localization signal, no transmembrane domain | 2.28 | (Bougdoor et al. 2013; Panas and Boothroyd 2020)          |
| GRA18                                     | TGME49_288840  | induces the expression of genes associated with an anti-inflammatory response                                                         | signal peptide no transmembrane domain                                         | 1.66 | (He et al. 2018)                                          |

|             |                |                                                                                                                                                                                    |                                                    |       |                                                            |
|-------------|----------------|------------------------------------------------------------------------------------------------------------------------------------------------------------------------------------|----------------------------------------------------|-------|------------------------------------------------------------|
| GRA20       | TGGT1_200010   | may participate in the manipulation of the host immunity. Located at the PVM                                                                                                       | no signal peptide or transmembrane domain          | 2.54  | (Hsiao et al. 2013; Ning et al. 2015)                      |
| GRA24       | TGME49_230180* | Activates the mitogen-activated protein kinase, promotes p38 MAPK activation during host immunity. Located at the host nucleus. Negative regulation of bradyzoite differentiation. | no signal peptide, transmembrane domain, NLS       | 2.86  | (Braun et al. 2013; Mercer et al. 2020; Odell et al. 2015) |
| GRA25       | TGME49_290700  | Modulates host immune responses. Located in the PV                                                                                                                                 | signal peptide, no transmembrane domain            | 1.31  | (Shastri et al. 2014)                                      |
| GRA28       | TGGT1_231960   | Required for Placenta-Specific Induction of the Regulatory Chemokine CCL22 in Human and Mouse. Localized to the host nucleus                                                       | signal peptide, no transmembrane domain            | 1.48  | (Rudzki et al. 2021)                                       |
| GRA35       | TGGT1_226380   | induces Lewis rat macrophage pyroptosis and establishes a chronic infection in vivo. Located at the PV.                                                                            | signal peptide, transmembrane, coiled-coil domains | 1.98  | (Bai et al. 2018; Wang et al. 2019)                        |
| GRA39       | TGME49_289380  | virulence factor that can interfere with host cell signaling pathways                                                                                                              | signal peptide no transmembrane domain             | -4.8  | (Nadipuram et al. 2016)                                    |
| GRA42       | TgME49_236870  | required for induction of Lewis rat macrophage pyroptosis, chaperone for GRA protein into PVM. Located in the PV lumen                                                             | signal peptide, transmembrane domains              | 2.8   | (Wang et al. 2019)                                         |
| GRA43       | TgME49_237015  | required for induction of Lewis rat macrophage pyroptosis, chaperone for GRA protein into PVM. Located in the PV lumen                                                             | signal peptide, transmembrane domains              | 2.34  | (Wang et al. 2019)                                         |
| GRA60       | TGME49_204270  | modulates host cell immunity and contributes to parasite virulence. Located at PVM.                                                                                                | signal peptide, transmembrane domains              | -0.59 | (Nyonda et al. 2021)                                       |
| Cyclophilin | TGME49_221210  | Identified in multiple BioID pulldowns using known PV proteins, DG localization                                                                                                    | Has signal peptide, no                             | -1.6  | (Nadipuram et al. 2016;                                    |

|                                                    |                |                                                                                                                           |                                           |       |                                          |
|----------------------------------------------------|----------------|---------------------------------------------------------------------------------------------------------------------------|-------------------------------------------|-------|------------------------------------------|
|                                                    |                | not verified by microscopy. Possible role in suppressing host immune response                                             | transmembrane domain                      |       | Nadipuram et al. 2020)                   |
| HCE1/<br>TEERG                                     | TGGT1_239010   | modulates E2F transcription factor target genes to co-opt human cells for proper parasite growth. Located in host nucleus | transmembrane domain no signal peptide    | 1.46  | (Panas et al. 2019)                      |
| IST1                                               | TGME49_240060* | inhibits STAT1-dependent transcription in host cell. Localized to host cell nucleus                                       | no signal peptide or transmembrane domain | 1.44  | (Gay et al. 2016)                        |
| NSM                                                | TGME49_235140  | Blocks IFN-driven expression of PKR and MLKL allowing for parasite survival in the host. Located in the cytosol.          | No signal peptide or transmembrane domain | 1.41  | (Rosenberg and Sibley 2021)              |
| Regulation of GRA protein function and trafficking |                |                                                                                                                           |                                           |       |                                          |
| WNG1                                               | TGME49_304740* | Localized to the PV lumen, phosphorylates GRA proteins, required for GRA6 insertion into the IVN                          | no signal peptide or transmembrane domain | 1.1   | (Coffey et al. 2018; Beraki et al. 2019) |
| WNG2                                               | TGME49_240090* | Localized to the PV lumen, knockout reduces virulence in mice                                                             | transmembrane domain, so signal peptide   | 0.69  | (Coffey et al. 2018)                     |
| GRA45                                              | TGME49_316250* | ASP5 substrate that acts as chaperone for effector proteins to the PVM                                                    | signal peptide no transmembrane domain    | 1.8   | (Cygan et al. 2020; Y. Wang et al. 2020) |
| Cyst Wall Proteins                                 |                |                                                                                                                           |                                           |       |                                          |
| GRA31                                              | TGGT1_220240   | hypothetical protein found in cyst wall                                                                                   | transmembrane domain, no signal peptide   | 0.9   | (Bai et al. 2018)                        |
| GRA50/<br>CST2                                     | TGME49_203600  | establishes chronic infection                                                                                             | transmembrane domain, no signal peptide   | 2.29  | (Tu et al. 2019)                         |
| GRA51/<br>CST3                                     | TGME49_230705  | cyst wall proteins                                                                                                        | signal peptide, transmembrane domains     | 1.34  | (Tu et al. 2019)                         |
| GRA52/<br>CST5                                     | TGME49_319340  | cyst wall proteins                                                                                                        | signal peptide, transmembrane domains     | -3.96 | (Tu et al. 2019)                         |
| GRA53/<br>CST6                                     | TGME49_260520  | cyst wall proteins                                                                                                        | no signal peptide or transmembrane domain | 1.9   | (Tu et al. 2019)                         |

|                                |               |                                                                                             |                                                                    |       |                                                              |
|--------------------------------|---------------|---------------------------------------------------------------------------------------------|--------------------------------------------------------------------|-------|--------------------------------------------------------------|
| GRA55                          | TgME49_309760 | establishment or maintenance of cysts in the mouse brain. localizes to the PV and cyst wall | no signal peptide or transmembrane domain                          | 2.18  | (Nadipuram et al. 2020)                                      |
| GRA56                          | TgME49_309930 | hydrolase activity, may catabolize melibiose for energy after uptake into the PV            | no signal peptide or transmembrane domain                          | -1.13 | (Nadipuram et al. 2020)                                      |
| CST1                           | TGME49_064660 | maintains cyst wall integrity and promotes bradyzoite persistence                           | Transmembrane domain, no signal peptide                            | 0.85  | (Guevara et al. 2020; Tomita et al. 2013; Zhang et al. 2020) |
| CST4                           | TGME49_261650 | cyst wall proteins                                                                          | WD40 repeat-like domain, no signal peptide or transmembrane domain | 1.61  | (Tu et al. 2020)                                             |
| CST7                           | TgME49_258870 | cyst wall proteins                                                                          | transmembrane domain, no signal peptide                            | 1.32  | (Tu et al. 2020)                                             |
| CST8                           | TgME49_204340 | cyst wall proteins                                                                          | signal peptide, transmembrane domains                              | 1.6   | (Tu et al. 2020)                                             |
| CST9                           | TgME49_310790 | cyst wall proteins                                                                          | signal peptide, no transmembrane domain                            | -3.1  | (Tu et al. 2020)                                             |
| MAG1                           | TGME49_270240 | Expressed in Bradyzoites and modulates IL-1 $\beta$ secretion in the PV                     | signal peptide, transmembrane domains                              | 1.23  | (Tomita et al. 2021)                                         |
| BPK1                           | TGME49_253330 | Needed for the development and infectivity of cysts. Located at the cyst wall.              | signal peptide, no transmembrane domain                            | -1.78 | (Buchholz et al. 2011; 2013)                                 |
| Proteins with unknown function |               |                                                                                             |                                                                    |       |                                                              |
| GRA1                           | TGME49_270250 | Potential function in suppression of host apoptosis. Localizes to the PV lumen              | signal peptide, calcium binding domain, no transmembrane domain    | -5.27 | (Cesbron-Delauw et al. 1989; Wu et al. 2017)                 |
| GRA5                           | TGME49_286450 | may have a critical function in parasite-host interaction. Located in PV and PVM            | transmembrane domain, no signal peptide                            | 2.58  | (Chen et al. 2012; Lecordier et al. 1999)                    |

|       |                |                                                                              |                                                                    |       |                                                                 |
|-------|----------------|------------------------------------------------------------------------------|--------------------------------------------------------------------|-------|-----------------------------------------------------------------|
| GRA9  | TGME49_251540  | May be involved in parasite egress and virulence. Located at the PVM and IVN | hydrophobic alpha-helices, signal peptide, no transmembrane domain |       | (Guo et al. 2019; Mercier et al. 2005)                          |
| GRA10 | TGME49_268900  | Required for parasite growth. Located in the PV lumen                        | transmembrane domain, no signal peptide                            | -4.45 | (Nam 2009; Mercier and Cesbron-Delauw 2015; Witola et al. 2014) |
| GRA19 | TgME49_087740* | Interacts with and may have a role at the PVM                                | no signal peptide or transmembrane domain                          | -1.66 | (Hsiao et al. 2013; Mercier and Cesbron-Delauw 2015)            |
| GRA21 | TgME49_041610* | Localized at the PV and PVM                                                  | signal peptide no transmembrane domain                             | ND    | (Hsiao et al. 2013; Mercier and Cesbron-Delauw 2015)            |
| GRA30 | TGGT1_232000   | Not essential in RH strain                                                   | transmembrane domain, no signal peptide                            | 2.29  | (Bai et al. 2018)                                               |
| GRA33 | TGGT1_247440   | hypothetical protein found in cyst wall                                      | signal peptide, transmembrane domains                              | 1.72  | (Bai et al. 2018; Tu et al. 2019)                               |
| GRA34 | TGGT1_203290   | hypothetical protein found in cyst wall                                      | signal peptide, transmembrane domains                              | 2.26  | (Bai et al. 2018; Tu et al. 2019)                               |
| GRA36 | TGGT1_213067   | Not essential in RH strain                                                   | signal peptide, transmembrane domains                              | -0.21 | (Bai et al. 2018)                                               |
| GRA37 | TGGT1_236890   | Not essential in RH strain                                                   | transmembrane domain, no signal peptide                            | 2.1   | (Bai et al. 2018)                                               |
| GRA38 | TGGT1_312420   | hypothetical protein possibly located in the PV                              | signal peptide, no transmembrane domain                            | -1.15 | (Bai et al. 2018; Nadipuram et al. 2016)                        |
| GRA40 | TGGT1_219810   | hypothetical protein possibly in the PV                                      | transmembrane domain, no signal peptide                            | 0.69  | (Bai et al. 2018)                                               |



|                                |                |                                                                                       |                                                                                 |       |                                      |
|--------------------------------|----------------|---------------------------------------------------------------------------------------|---------------------------------------------------------------------------------|-------|--------------------------------------|
| GRA46                          | TGME49_208370* | Not essential for ME49 strain, localized to the DG membrane, not secreted into the PV | signal peptide, transmembrane domains                                           | 1.79  | (Coffey et al. 2018)                 |
| GRA47                          | TGME49_254000  | hypothetical protein important for parasite survival in ME49 strain                   | no signal peptide or transmembrane domain                                       | -3.49 | (Beraki et al. 2019; Tu et al. 2019) |
| GRA48                          | TgME49_267740  | Not essential for ME49 strain                                                         | transmembrane domain, no signal peptide                                         | 1.89  | (Tu et al. 2019)                     |
| GRA49                          | TgME49_244530  | Not essential in ME49 strain                                                          | no signal peptide or transmembrane domain                                       | 2.2   | (Tu et al. 2019)                     |
| GRA57                          | TGME49_217680  | Not essential in ME49 strain                                                          | no signal peptide or transmembrane domain                                       | 0.99  | (Nadipuram et al. 2020)              |
| GRA58                          | TGME49_268790  | Not essential in ME49 strain                                                          | no signal peptide or transmembrane domain                                       | 1.63  | (Nadipuram et al. 2020)              |
| GRA59                          | TGME49_313440  | Not essential in ME49 strain                                                          | signal peptide, no transmembrane domain                                         | 1.63  | (Nadipuram et al. 2020)              |
| <b>Strand Forming Proteins</b> |                |                                                                                       |                                                                                 |       |                                      |
| SFP1                           | TGGT1_289540   | stranded structure formation within the PV                                            | four coiled-coil domains, no signal peptide or transmembrane domain             | 0.33  | (Young et al. 2020)                  |
| GRA29                          | TGME49_269690  | regulates SFP1 and cyst formation and forms stranded structures in the PV             | signal peptide, transmembrane domains                                           | 1.54  | (Young et al. 2020)                  |
| <b>Egress</b>                  |                |                                                                                       |                                                                                 |       |                                      |
| DGK2                           | TGME49_259830  | Makes phosphatidic acid, required for natural parasite egress                         | diacylglycerol kinase catalytic domain, signal peptide, no transmembrane domain | 0.05  | (Bisio et al. 2019)                  |

|       |               |                                                                                                   |                                           |      |                                                      |
|-------|---------------|---------------------------------------------------------------------------------------------------|-------------------------------------------|------|------------------------------------------------------|
| GRA22 | TgME49_215220 | required for regulating parasite egress. Located at the PV                                        | no signal peptide or transmembrane domain | 1.07 | (Mercier and Cesbron-Delauw 2015; Okada et al. 2013) |
| GRA41 | TGGT1_069070  | Regulates calcium levels and the timing of egress. Secreted in the PV and associates with the TVN | N-terminal signal sequence                | ND   | (LaFavers et al. 2017)                               |
